# Supplementary material for: Microbiota Dynamics in Patients Treated with Fecal Microbiota Transplantation for Recurrent Clostridium difficile Infection
Source: PLOS journal article supplement (doi:10.1371/journal.pone.0081330), 2013-11-26
Supplement: S1 (10.1371/journal.pone.0081330.s001) [file journal.pone.0081330.s001]

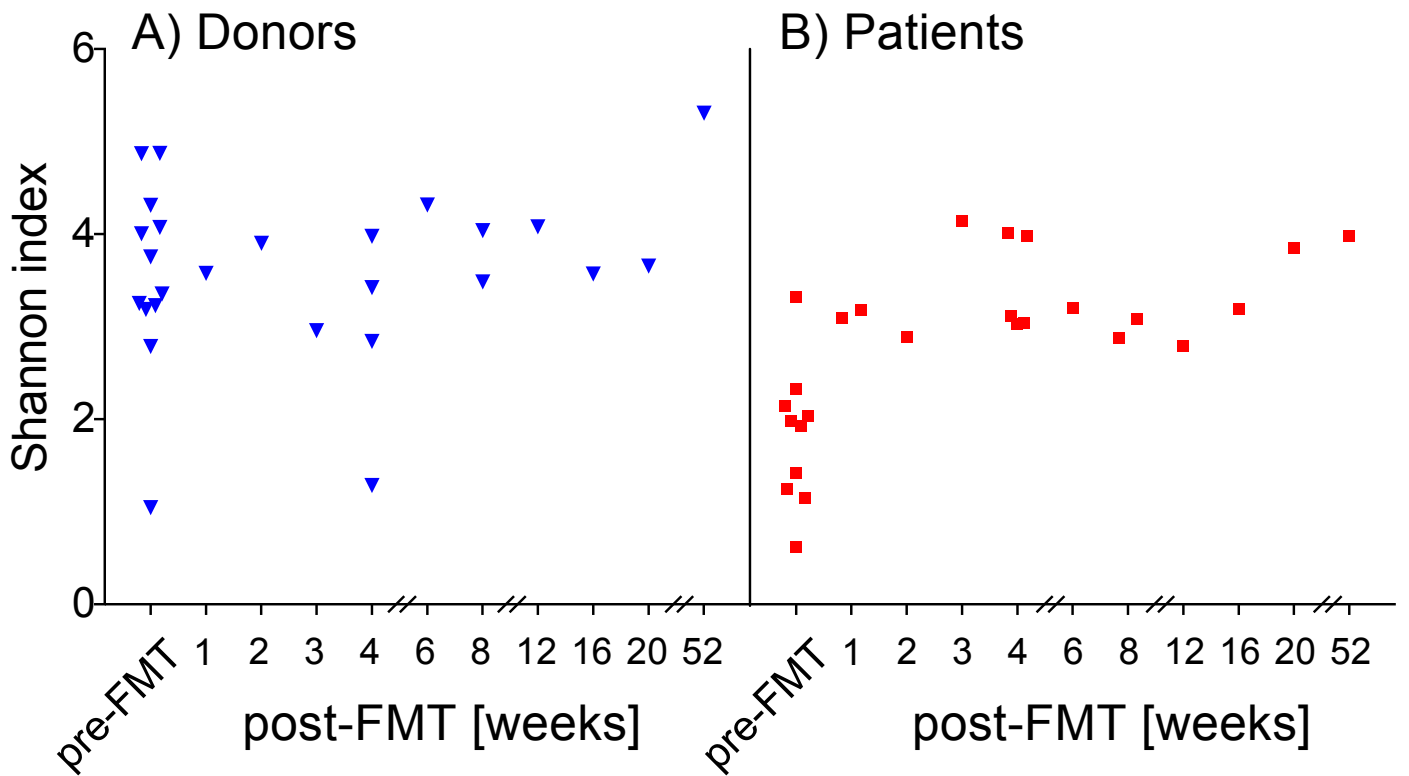

**Figure S1. Fecal microbiota diversity in patient and donor samples depending on collection time points.** The Shannon index of all samples is plotted over time, split into donor (A, blue) and patient (B, red) samples.
