# Supplementary material for: Microbiota Dynamics in Patients Treated with Fecal Microbiota Transplantation for Recurrent Clostridium difficile Infection
Source: PLOS journal article supplement (doi:10.1371/journal.pone.0081330), 2013-11-26
Supplement: S2 (10.1371/journal.pone.0081330.s002) [file journal.pone.0081330.s002]

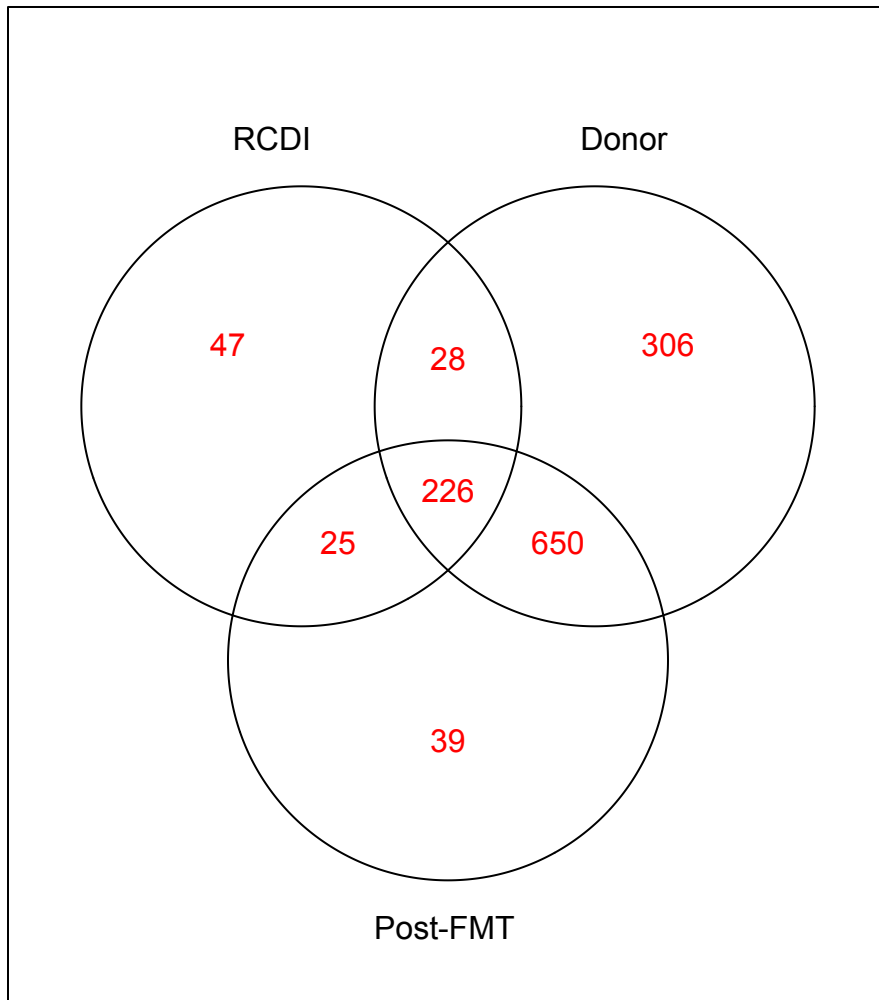

**Figure S2. Venn diagram showing shared OTUs between RCDI and post-FMT patient and donor samples.** Only OTUs represented by at least 5 reads across all 56 samples are shown.
