# Supplementary material for: Microbiota Dynamics in Patients Treated with Fecal Microbiota Transplantation for Recurrent Clostridium difficile Infection
Source: PLOS journal article supplement (doi:10.1371/journal.pone.0081330), 2013-11-26
Supplement: S3 (10.1371/journal.pone.0081330.s003) [file journal.pone.0081330.s003]

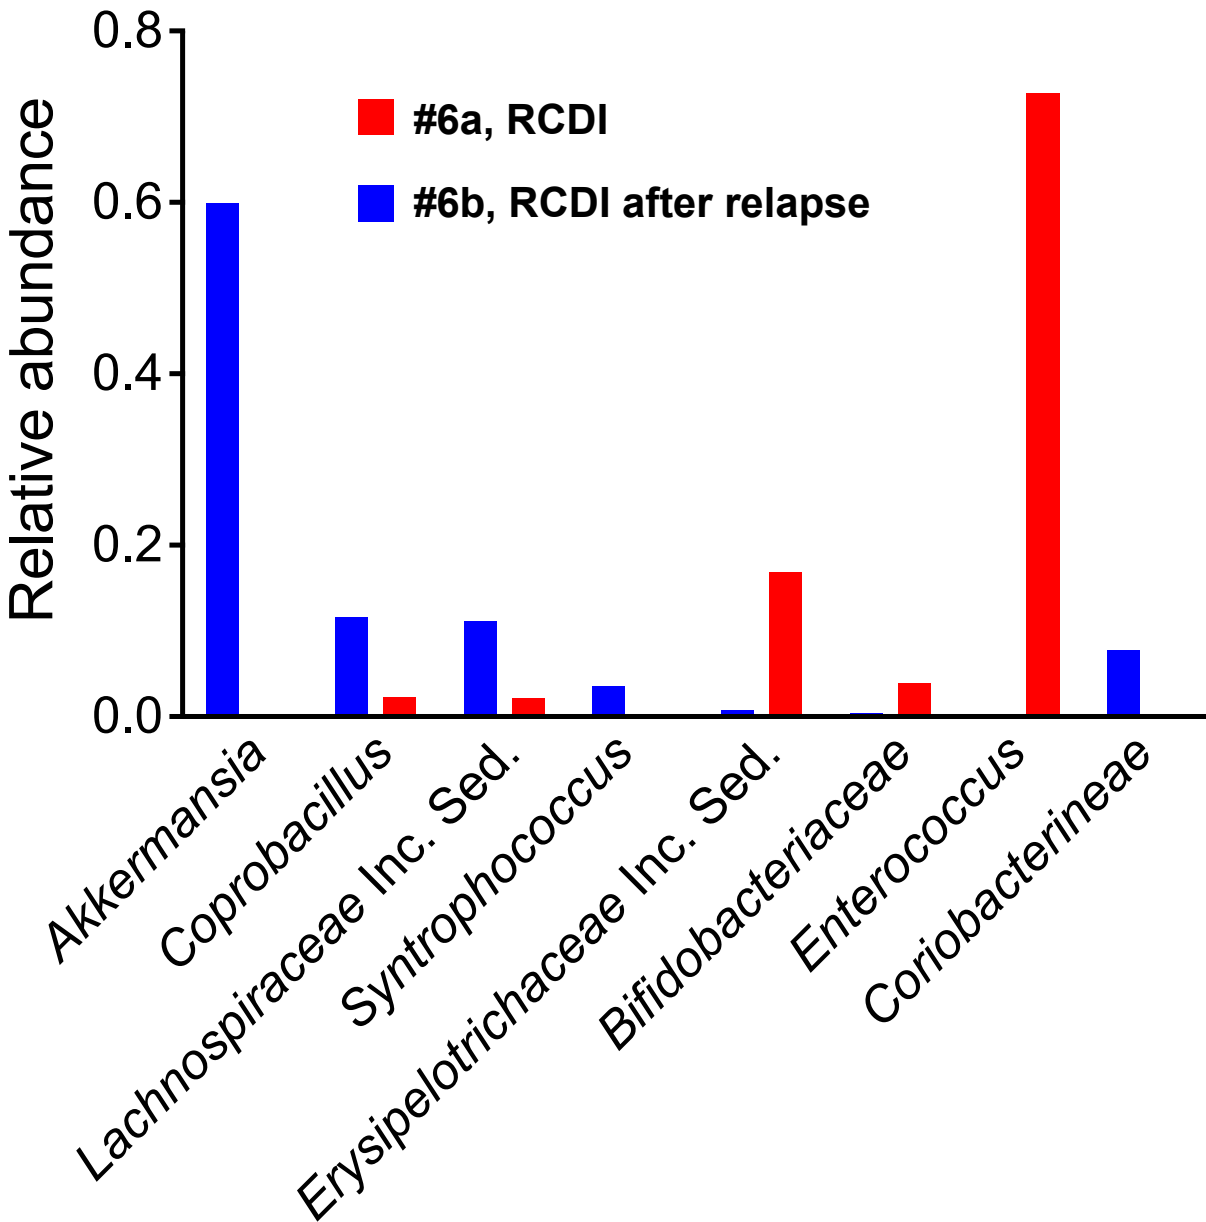

**Figure S3. Microbiota changes between RCDI samples collected from the same patient before the first FMT (#6a) and, after antibiotic-induced relapse, before the second FMT (#6b). Relative abundances of all taxonomic genera (>1%) are shown.**
